# Supplementary material for: Age-Associated Changes in Gut Microbiota and Dietary Components Related with the Immune System in Adulthood and Old Age: A Cross-Sectional Study
Source: PubMed Central journal article supplement (PMC6722604; doi:10.3390/nu11081765), 2019-07-31
Supplement: nutrients-11-01765-s001.pdf [file nutrients-11-01765-s001.pdf]

Supplementary Table 1. Exclusion criteria used in the present study.

---

**Exclusion criteria**

---

*Previous diagnosis of:*

- Gastrointestinal cancer
- Inflammatory bowel disease
- Allergy, diabetes type II
- Other autoimmune disease
- Morbid obesity
- Any disease requiring gastrointestinal surgery

*Consumption during the previous month of:*

- Food supplements
  - Probiotic or prebiotic supplemented foods (standard yogurt consumption was allowed)
  - Antibiotics
  - Oral glucocorticoids
  - Immunotherapy
-
